# Supplementary material for: Identification of 4-acrylamido-N-(pyridazin-3-yl)benzamide as anti-COVID-19 compound: a DFTB, molecular docking, and molecular dynamics study
Source: Royal Society of Chemistry journal article supplement (doi:10.1039/d2ra04333e), 2022-01-01
Supplement: d2ra04333e1.pdf [file d2ra04333e1.pdf]

## Electronic Supplementary Information

### **Identification of 4-acrylamido-N-(pyridazin-3-yl)benzamide as anti-COVID-19 compound: A DFTB, molecular docking, and molecular dynamics study**

Nayim Sepay<sup>a\*</sup>, Sukanya Chakrabarti<sup>a</sup>, Mohd Afzal<sup>b</sup>, Abdullah Alarifi<sup>b</sup> and Dasarath Mal<sup>c</sup>

<sup>a</sup>Department of Chemistry, Lady Brabourne College, Kolkata 700017, India. E-Mail-  
[nayimsepay@yahoo.com](mailto:nayimsepay@yahoo.com)

<sup>b</sup>Department of Chemistry, College of Science, King Saud University, Riyadh 11451, Saudi Arabia.

<sup>c</sup>Department of Chemistry, Vijaygarh Jyotish Ray College, Kolkata 700032, India.

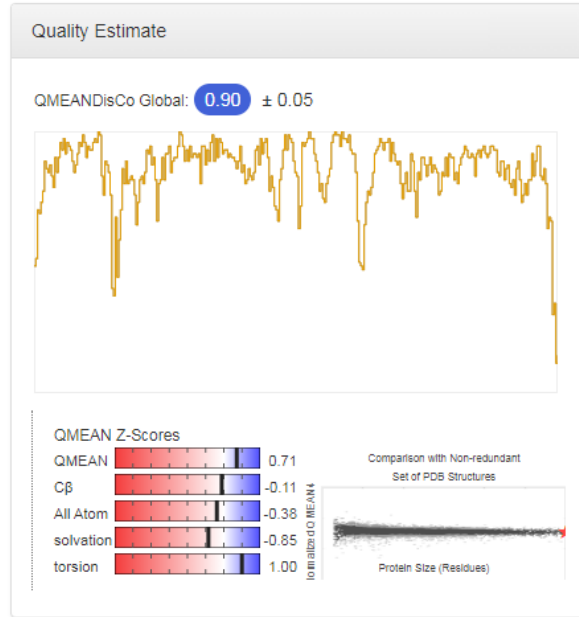

**Fig. S1** QMEANDisCo Global scores of SARS-CoV-2 M<sup>pro</sup> protein

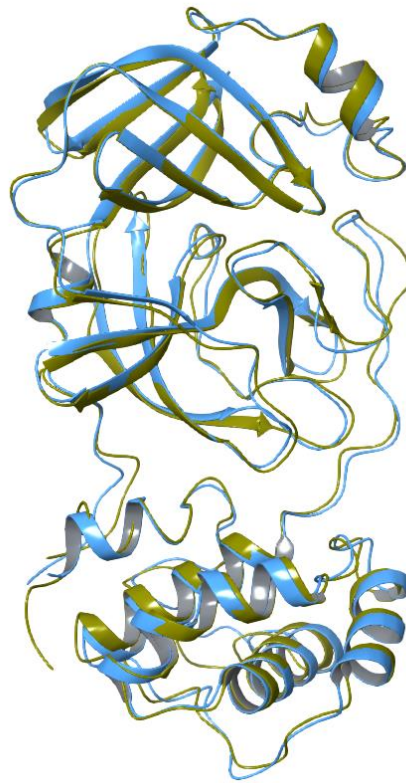

**Fig. S2** Overlay of the models of SARS-CoV-2 M<sup>pro</sup> before (blue) and after (dark yellow) energy minimization

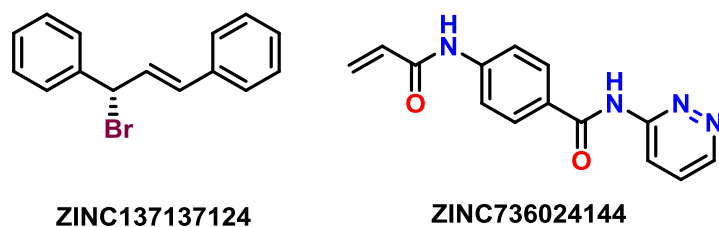

**Fig. S3** The chemical structure of compounds showed the highest binding affinity toward SARS-CoV-2 M<sup>pro</sup>

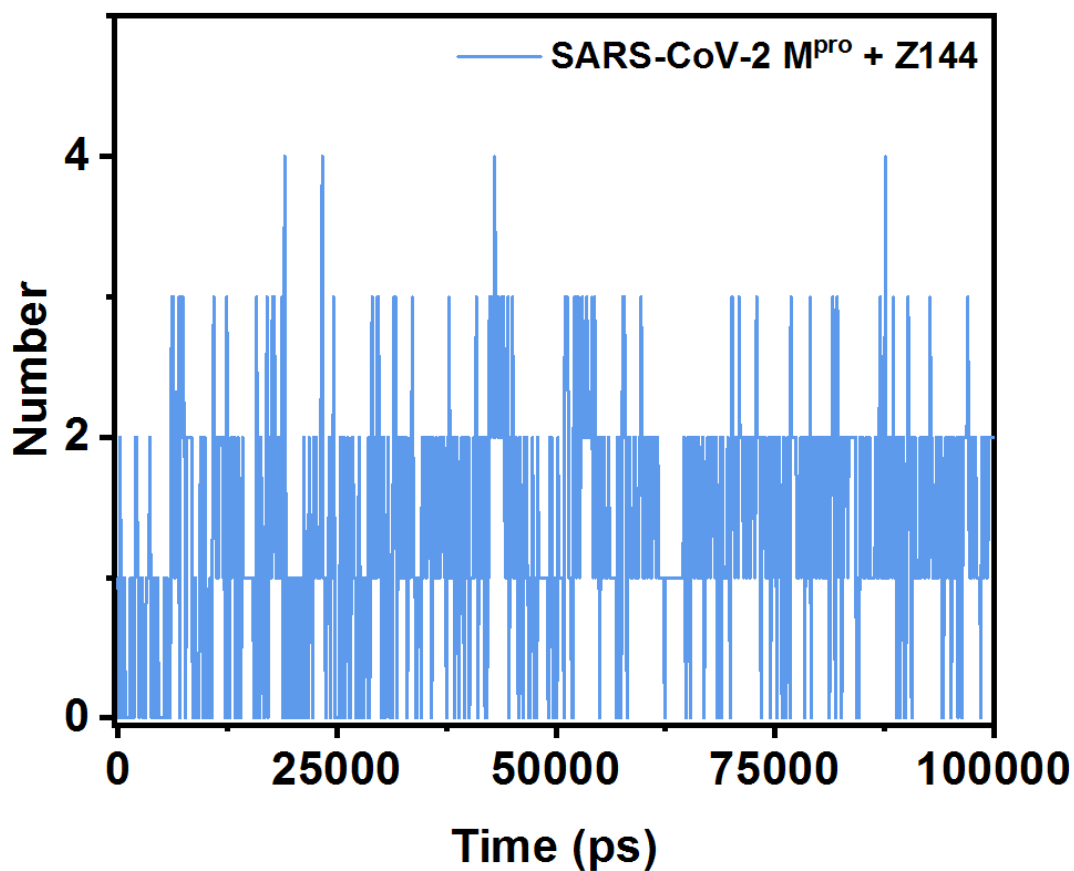

**Fig. S4** The hydrogen bonding between **Z144** and SARS-CoV-2 M<sup>pro</sup> during the trajectory obtained from MD.

**Table S1** Binding energy from docking study with SARS-CoV-2 M<sup>PRO</sup> and SMILES of compounds obtained from ZINC 15 database

| S. No | Compounds      | SMILES                                            | Docking energy | K <sub>i</sub> (M) |
|-------|----------------|---------------------------------------------------|----------------|--------------------|
| 1     | ZINC1532572628 | <chem>CCC(=O)c1ccc(NC(=O)c2cncc(Cl)c2)cc1</chem>  | -5.6           | 7.82E-05           |
| 2     | ZINC1532170012 | <chem>CCC(=O)c1ccc(NC(=O)c2cncc(C)c2)cc1</chem>   | -5.4           | 1.10E-04           |
| 3     | ZINC1130999491 | <chem>CCC(=O)c1ccc(NC(=O)c2ccnc(Cl)c2)cc1</chem>  | -5.6           | 7.82E-05           |
| 4     | ZINC1131202558 | <chem>CCC(=O)c1ccc(NC(=O)c2cncc(F)c2)cc1</chem>   | -5.6           | 7.82E-05           |
| 5     | ZINC1147402683 | <chem>Cc1cncc(C(=O)Nc2ccc(C(=O)CBr)cc2)c1</chem>  | -5.8           | 5.58E-05           |
| 6     | ZINC1437705401 | <chem>CCC(=O)c1ccc(NC(=O)c2cncc(I)c2)cc1</chem>   | -5.7           | 6.60E-05           |
| 7     | ZINC1461585059 | <chem>CCC(=O)c1ccc(NC(=O)c2cncc(Br)c2)cc1</chem>  | -5.6           | 7.82E-05           |
| 8     | ZINC1470123723 | <chem>CCC(=O)c1ccc(NC(=O)c2cncc(O)c2)cc1</chem>   | -5.6           | 7.82E-05           |
| 9     | ZINC1188621201 | <chem>O=C(CBr)c1ccc(NC(=O)c2ccnc(Br)c2)cc1</chem> | -5.5           | 9.26E-05           |
| 10    | ZINC1528834256 | <chem>CCC(=O)c1ccc(NC(=O)c2ccnc(C)c2)cc1</chem>   | -5.5           | 9.26E-05           |
| 11    | ZINC1146907821 | <chem>O=C(CBr)c1ccc(NC(=O)c2ccnc(O)c2)cc1</chem>  | -5.8           | 5.58E-05           |
| 12    | ZINC1188789692 | <chem>Cc1cc(C(=O)Nc2ccc(C(=O)CBr)cc2)ccn1</chem>  | -5.4           | 1.10E-04           |
| 13    | ZINC1412345829 | <chem>CCC(=O)c1ccc(NC(=O)c2ccnc(O)c2)cc1</chem>   | -6.0           | 3.98E-05           |
| 14    | ZINC1461582058 | <chem>CCC(=O)c1ccc(NC(=O)c2ccnc(F)c2)cc1</chem>   | -5.6           | 7.82E-05           |
| 15    | ZINC1532161994 | <chem>CCC(=O)c1ccc(NC(=O)c2cccc(Cl)c2)cc1</chem>  | -5.7           | 6.60E-05           |
| 16    | ZINC1539123431 | <chem>CCC(=O)c1ccc(NC(=O)c2ccnc(Br)c2)cc1</chem>  | -5.6           | 7.82E-05           |
| 17    | ZINC1131202548 | <chem>CCC(=O)c1ccc(NC(=O)c2cc(Cl)ccn2)cc1</chem>  | -5.7           | 6.60E-05           |
| 18    | ZINC48546120   | <chem>CCC(=O)c1ccc(NC(=O)c2cccc(C)c2)cc1</chem>   | -5.8           | 5.58E-05           |
| 19    | ZINC1166741925 | <chem>CCC(=O)c1ccc(NC(=O)c2cnnc(C)c2)cc1</chem>   | -5.8           | 5.58E-05           |
| 20    | ZINC1433526003 | <chem>CCC(=O)c1ccc(NC(=O)c2cncc(Cl)n2)cc1</chem>  | -5.7           | 6.60E-05           |
| 21    | ZINC1437703406 | <chem>CCC(=O)c1ccc(NC(=O)c2cccc(Cl)n2)cc1</chem>  | -5.7           | 6.60E-05           |
| 22    | ZINC1186152205 | <chem>O=C(CBr)c1ccc(NC(=O)c2cccc(S)c2)cc1</chem>  | -5.5           | 9.26E-05           |
| 23    | ZINC1191577661 | <chem>O=C(CBr)c1ccc(NC(=O)c2cnnc(O)c2)cc1</chem>  | -5.9           | 4.71E-05           |
| 24    | ZINC1361320731 | <chem>CNC(=O)c1ccc(NC(=O)c2cncc(Cl)c2)cc1</chem>  | -5.8           | 5.58E-05           |
| 25    | ZINC1363472418 | <chem>CCC(=O)c1ccc(NC(=O)c2cnnc(O)c2)cc1</chem>   | -6.0           | 3.98E-05           |
| 26    | ZINC1587376815 | <chem>CCC(=O)c1ccc(NC(=O)c2cccc(F)c2)cc1</chem>   | -5.7           | 6.60E-05           |
| 27    | ZINC1587377849 | <chem>CCC(=O)c1ccc(NC(=O)c2cccc(Br)c2)cc1</chem>  | -5.6           | 7.82E-05           |
| 28    | ZINC1617718146 | <chem>CCC(=O)c1ccc(NC(=O)c2cccc(I)c2)cc1</chem>   | -5.7           | 6.60E-05           |
| 29    | ZINC1629363646 | <chem>CCC(=O)c1ccc(NC(=O)c2cc(N)ccn2)cc1</chem>   | -5.6           | 7.82E-05           |
| 30    | ZINC79290900   | <chem>CNC(=O)c1ccc(NC(=O)c2cncc(C)c2)cc1</chem>   | -5.9           | 4.71E-05           |
| 31    | ZINC1130999324 | <chem>CCC(=O)c1ccc(NC(=O)c2cccc(C)n2)cc1</chem>   | -6.0           | 3.98E-05           |
| 32    | ZINC1147870431 | <chem>O=C(CBr)c1ccc(NC(=O)c2cncc(Br)n2)cc1</chem> | -5.5           | 9.26E-05           |
| 33    | ZINC8424244    | <chem>CNC(=O)c1ccc(NC(=O)c2cncc(Br)c2)cc1</chem>  | -5.9           | 4.71E-05           |
| 34    | ZINC109042869  | <chem>CNC(=O)c1ccc(NC(=O)c2cncc(O)c2)cc1</chem>   | -6.1           | 3.36E-05           |
| 35    | ZINC155643179  | <chem>CNC(=O)c1ccc(NC(=O)c2cncc(I)c2)cc1</chem>   | -5.6           | 7.82E-05           |
| 36    | ZINC164372679  | <chem>CNC(=O)c1ccc(NC(=O)c2cncc(F)c2)cc1</chem>   | -5.9           | 4.71E-05           |
| 37    | ZINC307951867  | <chem>COC(=O)c1ccc(NC(=O)c2cncc(Cl)c2)cc1</chem>  | -5.5           | 9.26E-05           |
| 38    | ZINC1147221214 | <chem>Cc1cccc(C(=O)Nc2ccc(C(=O)CBr)cc2)n1</chem>  | -5.7           | 6.60E-05           |
| 39    | ZINC1147302366 | <chem>O=C(CBr)c1ccc(NC(=O)c2cccc(O)n2)cc1</chem>  | -5.8           | 5.58E-05           |
| 40    | ZINC1188720210 | <chem>O=C(CBr)c1ccc(NC(=O)c2cccc(F)n2)cc1</chem>  | -5.6           | 7.82E-05           |
| 41    | ZINC1434191219 | <chem>CCC(=O)c1ccc(NC(=O)c2cccc(O)n2)cc1</chem>   | -6.0           | 3.98E-05           |

|    |                |                                          |      |          |
|----|----------------|------------------------------------------|------|----------|
| 42 | ZINC1461585851 | CCC(=O)c1ccc(NC(=O)c2cccc(Br)n2)cc1      | -5.4 | 1.10E-04 |
| 43 | ZINC1470120973 | CCC(=O)c1ccc(NC(=O)c2ccc[n+][[O-]]c2)cc1 | -5.4 | 1.10E-04 |
| 44 | ZINC1532170010 | CCC(=O)c1ccc(NC(=O)c2cccc(F)n2)cc1       | -5.6 | 7.82E-05 |
| 45 | ZINC307952759  | CC(=NO)c1ccc(NC(=O)c2cncc(Cl)c2)cc1      | -5.9 | 4.71E-05 |
| 46 | ZINC307970035  | NC(=NO)c1ccc(NC(=O)c2cncc(Cl)c2)cc1      | -6.0 | 3.98E-05 |
| 47 | ZINC121114     | COC(=O)c1ccc(NC(=O)c2cncc(Br)c2)cc1      | -5.6 | 7.82E-05 |
| 48 | ZINC82334639   | COC(=O)c1ccc(NC(=O)c2cncc(O)c2)cc1       | -6.0 | 3.98E-05 |
| 49 | ZINC88451750   | COC(=O)c1ccc(NC(=O)c2cncc(C)c2)cc1       | -5.7 | 6.60E-05 |
| 50 | ZINC124806588  | COC(=O)c1ccc(NC(=O)c2cncc(F)c2)cc1       | -5.8 | 5.58E-05 |
| 51 | ZINC154974090  | COC(=O)c1ccc(NC(=O)c2cncc(I)c2)cc1       | -5.4 | 1.10E-04 |
| 52 | ZINC3562587    | CNC(=O)c1ccc(NC(=O)c2cccc(Cl)c2)cc1      | -5.8 | 5.58E-05 |
| 53 | ZINC34925082   | NNC(=O)c1ccc(NC(=O)c2cccc(Cl)c2)cc1      | -5.8 | 5.58E-05 |
| 54 | ZINC252665735  | CC(=NO)c1ccc(NC(=O)c2cncc(C)c2)cc1       | -6.0 | 3.98E-05 |
| 55 | ZINC6618865    | CC[C@@H](C)c1ccc(NC(=O)c2cncc(Br)c2)cc1  | -5.5 | 9.26E-05 |
| 56 | ZINC6619083    | CC[C@H](C)c1ccc(NC(=O)c2cncc(Br)c2)cc1   | -5.5 | 9.26E-05 |
| 57 | ZINC20481016   | C/C(=N\O)c1ccc(NC(=O)c2cncc(Br)c2)cc1    | -6.1 | 3.36E-05 |
| 58 | ZINC40367438   | N/C(=N/O)c1ccc(NC(=O)c2cncc(Br)c2)cc1    | -5.9 | 4.71E-05 |
| 59 | ZINC88451862   | Cc1cncc(C(=O)Nc2ccc(/C(N)=N/O)cc2)c1     | -6.0 | 3.98E-05 |
| 60 | ZINC111776195  | CC[C@@H](C)c1ccc(NC(=O)c2cncc(O)c2)cc1   | -5.6 | 7.82E-05 |
| 61 | ZINC111776198  | CC[C@H](C)c1ccc(NC(=O)c2cncc(O)c2)cc1    | -5.6 | 7.82E-05 |
| 62 | ZINC165251069  | C/C(=N/O)c1ccc(NC(=O)c2cncc(F)c2)cc1     | -5.9 | 4.71E-05 |
| 63 | ZINC165318860  | N/C(=N/O)c1ccc(NC(=O)c2cncc(F)c2)cc1     | -6.1 | 3.36E-05 |
| 64 | ZINC312107418  | CC(=NO)c1ccc(NC(=O)c2cncc(Br)c2)cc1      | -5.8 | 5.58E-05 |
| 65 | ZINC379705214  | CC(=NO)c1ccc(NC(=O)c2cncc(F)c2)cc1       | -6.2 | 2.84E-05 |
| 66 | ZINC1147391348 | CC[C@@H](C)c1ccc(NC(=O)c2cncc(C)c2)cc1   | -5.8 | 5.58E-05 |
| 67 | ZINC1147391356 | CC[C@H](C)c1ccc(NC(=O)c2cncc(C)c2)cc1    | -5.9 | 4.71E-05 |
| 68 | ZINC128857     | COC(=O)c1ccc(NC(=O)c2cccc(Cl)c2)cc1      | -5.8 | 5.58E-05 |
| 69 | ZINC7597184    | CNC(=O)c1ccc(NC(=O)c2cccc(C)c2)cc1       | -5.8 | 5.58E-05 |
| 70 | ZINC188980812  | CNC(=O)c1ccc(NC(=O)c2cncc(Cl)n2)cc1      | -5.6 | 7.82E-05 |
| 71 | ZINC344730330  | CNC(=O)c1ccc(NC(=O)c2cnnc(C)c2)cc1       | -6.4 | 2.02E-05 |
| 72 | ZINC3562639    | CNC(=O)c1ccc(NC(=O)c2cccc(F)c2)cc1       | -5.8 | 5.58E-05 |
| 73 | ZINC4520332    | Cc1cccc(C(=O)Nc2ccc(C(=O)NN)cc2)c1       | -5.9 | 4.71E-05 |
| 74 | ZINC6220431    | NNC(=O)c1ccc(NC(=O)c2cccc(Br)c2)cc1      | -6.0 | 3.98E-05 |
| 75 | ZINC7597126    | CNC(=O)c1ccc(NC(=O)c2cccc(Br)c2)cc1      | -5.8 | 5.58E-05 |
| 76 | ZINC7597138    | CNC(=O)c1ccc(NC(=O)c2cccc(I)c2)cc1       | -5.4 | 1.10E-04 |
| 77 | ZINC37016168   | CNC(=O)c1ccc(NC(=O)c2cccc(N)c2)cc1       | -5.7 | 6.60E-05 |
| 78 | ZINC913167829  | CNC(=O)c1ccc(NC(=O)c2cccc(N)c2)cc1       | -5.9 | 4.71E-05 |
| 79 | ZINC918554367  | O=C(NO)c1ccc(NC(=O)c2cccc(Br)c2)cc1      | -6.0 | 3.98E-05 |
| 80 | ZINC1361848411 | CNC(=O)c1ccc(NC(=O)c2cnnc(O)c2)cc1       | -6.7 | 1.22E-05 |
| 81 | ZINC225320     | COC(=O)c1ccc(NC(=O)c2cccc(C)c2)cc1       | -5.7 | 6.60E-05 |
| 82 | ZINC1412056070 | CNC(=O)c1ccc(NC(=O)c2cncc(Cl)c2)nc1      | -6.0 | 3.98E-05 |
| 83 | ZINC232562964  | C/C=C/C(=O)c1cncnc1                      | -6.4 | 2.02E-05 |
| 84 | ZINC307902593  | C/C=C\C(=O)c1cncnc1                      | -4.8 | 3.02E-04 |
| 85 | ZINC575549302  | C/C=C/C(=O)c1ncccn1                      | -4.9 | 2.55E-04 |
| 86 | ZINC606243471  | C/C=C\C(=O)c1ncccn1                      | -4.7 | 3.57E-04 |
| 87 | ZINC5132781    | C/C=C/C(=O)c1cccnc1                      | -4.9 | 2.55E-04 |

|            |                      |                                          |             |                 |
|------------|----------------------|------------------------------------------|-------------|-----------------|
| 88         | ZINC195764880        | C/C=C\C(=O)c1cccnc1                      | -4.7        | 3.57E-04        |
| 89         | ZINC5606416          | C/C=C/C(=O)c1cccc1                       | -4.9        | 2.55E-04        |
| 90         | ZINC100017506        | C/C=C\C(=O)c1cccc1                       | -5.0        | 2.15E-04        |
| 91         | ZINC39051361         | C/C=C\C(=O)c1ccncc1                      | -4.6        | 4.23E-04        |
| 92         | ZINC218741164        | C/C=C/C(=O)c1ccncc1                      | -4.9        | 2.55E-04        |
| 93         | ZINC104591177        | N/C=C\C(=O)c1cccc1                       | -5.1        | 1.82E-04        |
| 94         | ZINC104179608        | C[C@@H]/(C=C\c1cccc1)c1cccc1             | -6.3        | 2.40E-05        |
| <b>95</b>  | <b>ZINC137137124</b> | <b>Br[C@@H]/(C=C/c1cccc1)c1cccc1</b>     | <b>-7.0</b> | <b>7.35E-06</b> |
| 96         | ZINC137137162        | Br[C@H]/(C=C/c1cccc1)c1cccc1             | -6.8        | 1.03E-05        |
| 97         | ZINC211718554        | Br[C@@H]/(C=C\c1cccc1)c1cccc1            | -6.2        | 2.84E-05        |
| 98         | ZINC211718627        | Br[C@H]/(C=C\c1cccc1)c1cccc1             | -6.5        | 1.71E-05        |
| 99         | ZINC701667672        | C=C(NNc1cccc1)c1cccc1                    | -6.1        | 3.36E-05        |
| 100        | ZINC238005334        | C=C(CNc1cccc1)c1cccc1                    | -6.3        | 2.40E-05        |
| 101        | ZINC254292786        | CC(=NNc1cccc1)c1cccc1                    | -6.2        | 2.84E-05        |
| 102        | ZINC779809490        | CC(=NN=c1cc[nH]cc1)c1cccc1               | -6.1        | 3.36E-05        |
| 103        | ZINC4114245          | CC(=NNc1cccc1)c1cccc1                    | -6.2        | 2.84E-05        |
| 104        | ZINC21986171         | C=C(CNc1cccc1)c1cccc1                    | -6.3        | 2.40E-05        |
| 105        | ZINC33966416         | CN(/N=C/c1cccc1)c1cccc1                  | -6.3        | 2.40E-05        |
| 106        | ZINC722673979        | CC(=NNc1cccc1)c1cccc1                    | -6.4        | 2.02E-05        |
| 107        | ZINC59153539         | CN(/N=C/c1cccc1)c1cccc1                  | -6.1        | 3.36E-05        |
| 108        | ZINC389704350        | CN(N=Cc1cccc1)c1cccc1                    | -6.2        | 2.84E-05        |
| 109        | ZINC4265707          | C[C@@H](NCc1cccc1)c1cccc1                | -5.9        | 4.71E-05        |
| 110        | ZINC70799990         | Br[C@H](CCc1cccc1)c1cccc1                | -5.8        | 5.58E-05        |
| 111        | ZINC70799995         | Br[C@@H](CCc1cccc1)c1cccc1               | -5.6        | 7.82E-05        |
| 112        | ZINC97513772         | C[C@@H](SCc1cccc1)c1cccc1                | -5.6        | 7.82E-05        |
| 113        | ZINC219843649        | C=CC(=O)Nc1ccc(NC(=O)c2cccnc2)cc1        | -5.7        | 6.60E-05        |
| 114        | ZINC265458181        | C=CC(=O)Nc1ccc(C(=O)N[C@@H]2CC=CCC2)cc1  | -5.9        | 4.71E-05        |
| 115        | ZINC265458183        | C=CC(=O)Nc1ccc(C(=O)N[C@H]2CC=CCC2)cc1   | -6.0        | 3.98E-05        |
| 116        | ZINC490540657        | C=CC(=O)Nc1ccc(C(=O)Nc2cccc2)cc1         | -6.0        | 3.98E-05        |
| 117        | ZINC490673695        | C=CC(=O)Nc1ccc(C(=O)Nc2cncnc2)cc1        | -5.8        | 5.58E-05        |
| 118        | ZINC685944904        | C=CC(=O)Nc1ccc(NC(=O)c2cccc2)cc1         | -6.2        | 2.84E-05        |
| <b>119</b> | <b>ZINC736024144</b> | <b>C=CC(=O)Nc1ccc(C(=O)Nc2cccnc2)cc1</b> | <b>-7.3</b> | <b>4.43E-06</b> |
| 120        | ZINC1129597078       | C=CC(=O)Nc1ccc(C(=O)Nc2ccnnc2)cc1        | -6.0        | 3.98E-05        |
| 121        | ZINC1150006794       | C=CC(=O)Nc1ccc(C(=O)N[C@@H]2C=CCCC2)cc1  | -6.0        | 3.98E-05        |
| 122        | ZINC1150006795       | C=CC(=O)Nc1ccc(C(=O)N[C@H]2C=CCCC2)cc1   | -6.3        | 2.40E-05        |
| 123        | ZINC1336680773       | C=CC(=O)Nc1ccc(C(=O)Nc2cccnc2)cc1        | -6.0        | 3.98E-05        |
| 124        | ZINC1337569058       | C=CC(=O)Nc1ccc(C(=O)Nc2cccc2)cc1         | -6.4        | 2.02E-05        |
| 125        | ZINC1353366517       | C=CC(=O)Nc1ccc(C(=O)Nc2cccc2)cc1         | -6.5        | 1.71E-05        |
